# Supplementary material for: Trimetallic coordination cage formation for nitrate encapsulation: transformation of kinetic products into thermodynamic products
Source: Royal Society of Chemistry journal article supplement (doi:10.1039/d1dt02691g), 2021-01-01
Supplement: d1dt02691g1.pdf [file d1dt02691g1.pdf]

**<Electronic Supplementary Information>**

**Formation Procedure of Trimetallic Coordination Cages for Nitrate Encapsulation:**

**Transformation of Kinetic into Thermodynamic Products**

Sangwoo Lim, Heehun Moon, Dongwon Kim, and Ok-Sang Jung\*

Department of Chemistry, Pusan National University, Busan 46241, Republic of Korea Fax: (+82) 51-5163522;

Tel: (+82) 51-5103240; E-mail: oksjung@pusan.ac.kr

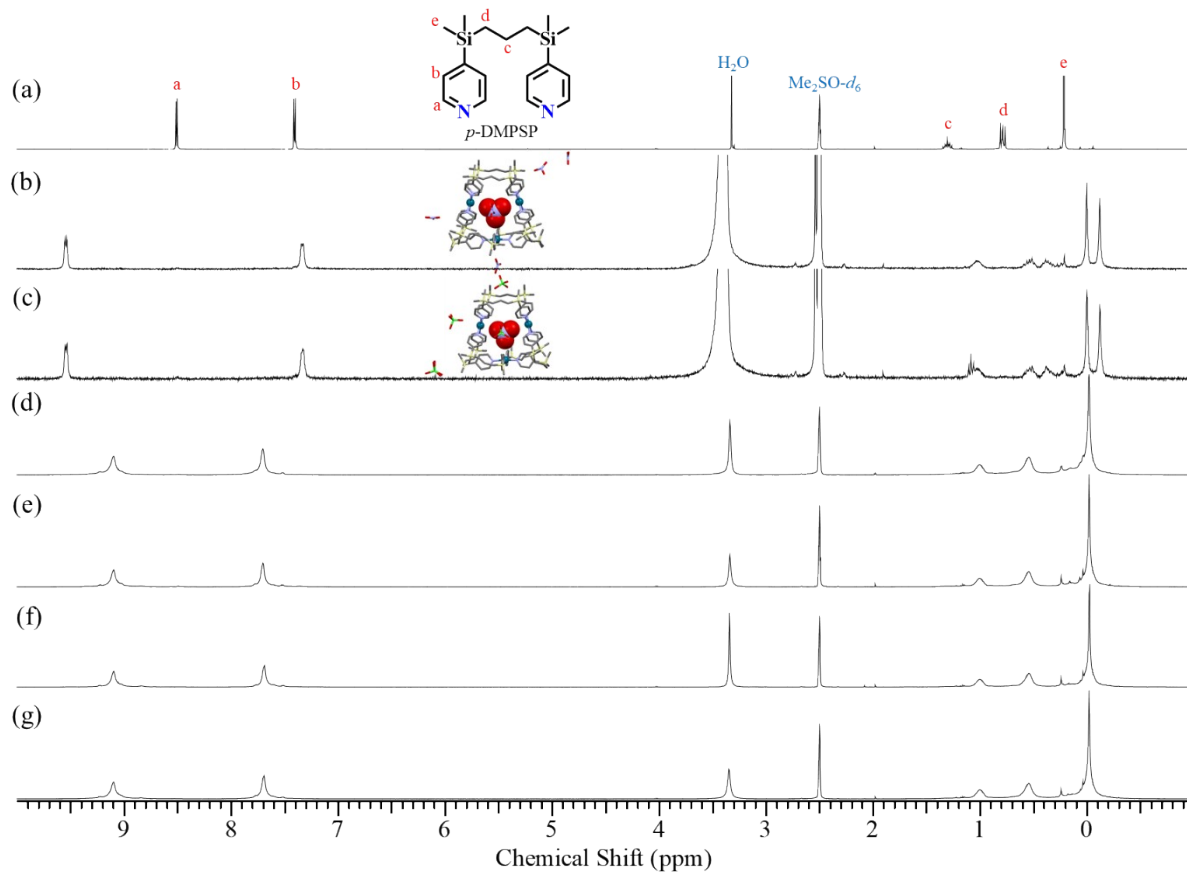

**Fig. S1**  $^1\text{H}$  NMR Spectra for L (a),  $[(\text{NO}_3)_3\text{Pd}_3\text{L}_6](\text{NO}_3)_5 \cdot 2\text{Me}_2\text{SO}$  (b),  $[(\text{NO}_3)_3\text{Pd}_3\text{L}_6](\text{ClO}_4)_5 \cdot 5\text{Me}_2\text{SO}$  (c),  $[\text{PdL}_2](\text{BF}_4)_2$  (d),  $[\text{PdL}_2](\text{ClO}_4)_2$  (e),  $[\text{PdL}_2](\text{PF}_6)_2$  (f), and  $[\text{PdL}_2](\text{CF}_3\text{SO}_3)_2$  (g) in  $\text{Me}_2\text{SO}-d_6$ .

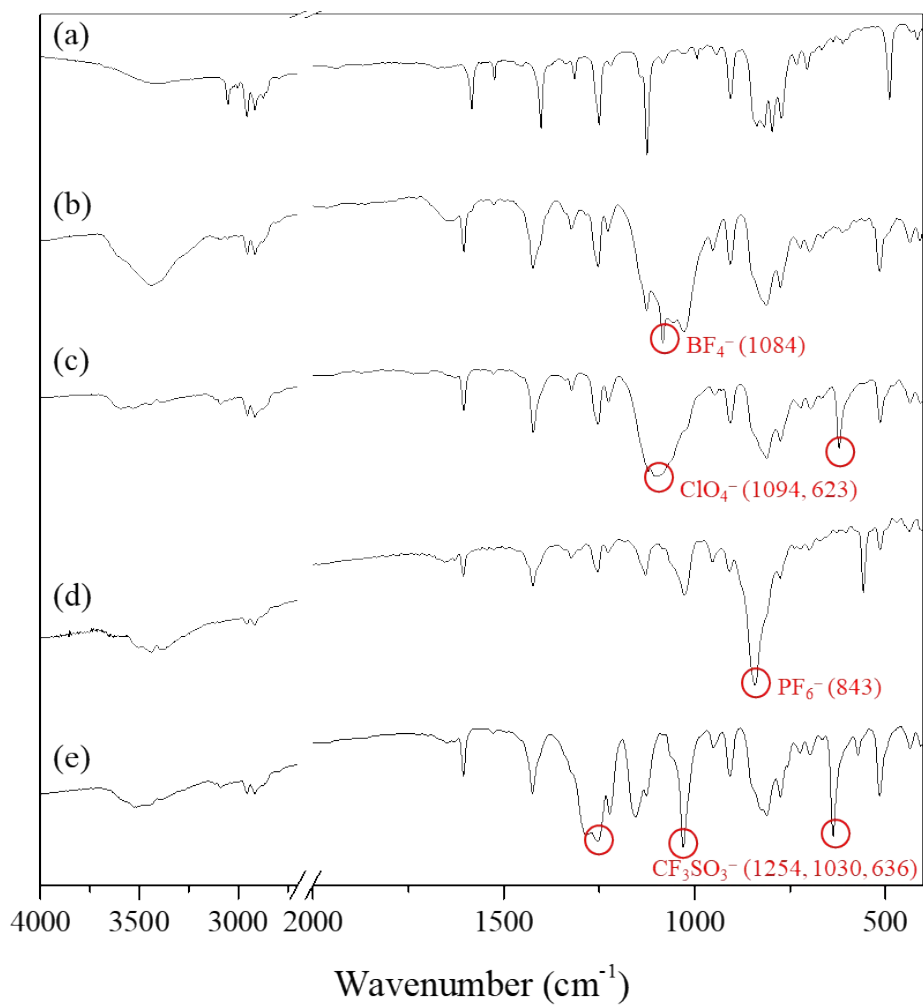

**Fig. S2** IR spectra of L (a),  $[\text{PdL}_2](\text{BF}_4)_2$  (b),  $[\text{PdL}_2](\text{ClO}_4)_2$  (c),  $[\text{PdL}_2](\text{PF}_6)_2$  (d), and  $[\text{PdL}_2](\text{CF}_3\text{SO}_3)_2$  (e).

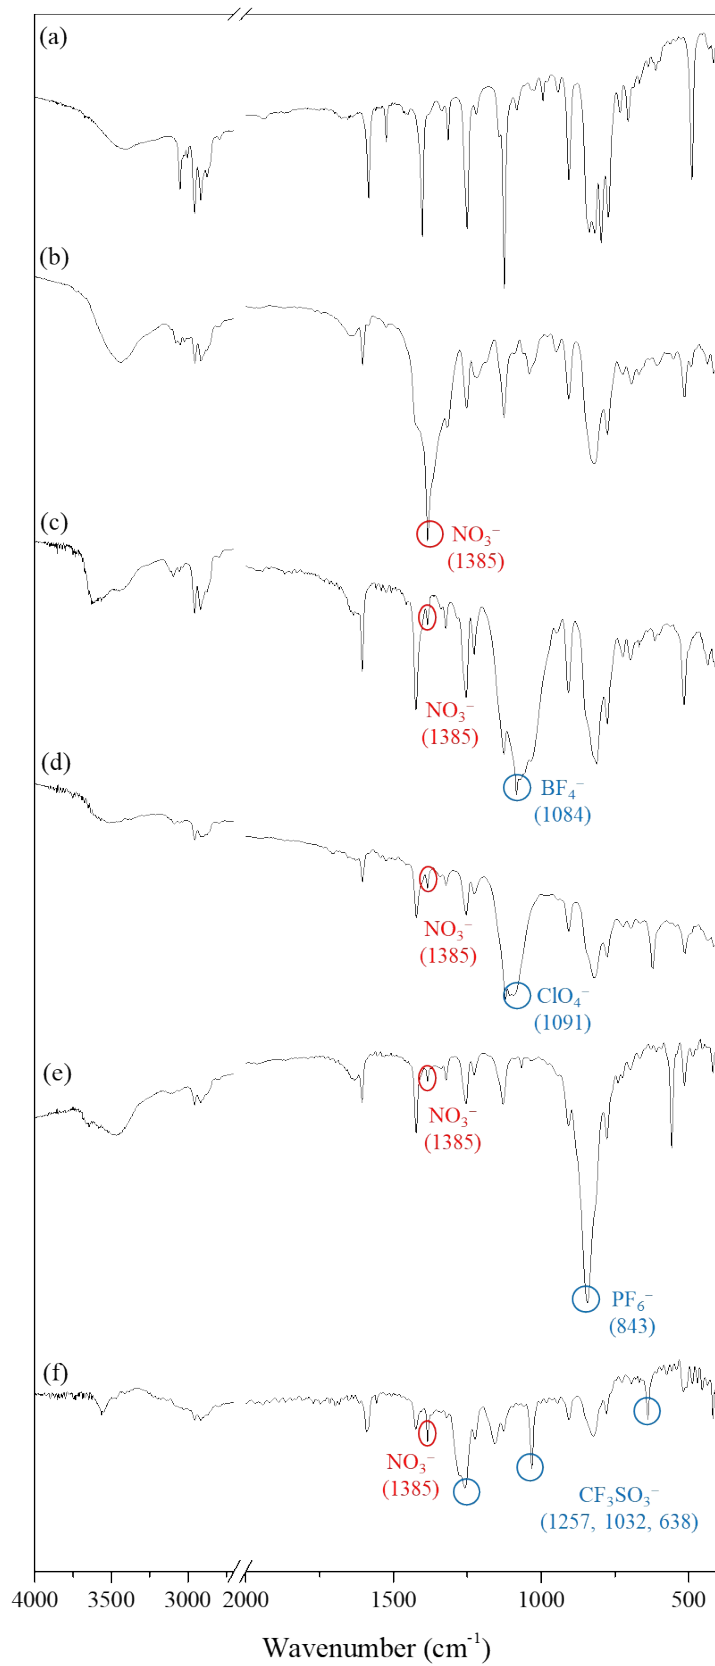

**Fig. S3** IR spectra of L (a), [(NO<sub>3</sub>)@Pd<sub>3</sub>L<sub>6</sub>](NO<sub>3</sub>)<sub>5</sub>·2Me<sub>2</sub>SO (b), and [(NO<sub>3</sub>)@Pd<sub>3</sub>L<sub>6</sub>](X)<sub>5</sub> via anion exchange of [(NO<sub>3</sub>)@Pd<sub>3</sub>L<sub>6</sub>](NO<sub>3</sub>)<sub>5</sub>·2Me<sub>2</sub>SO with BF<sub>4</sub><sup>-</sup> (c), ClO<sub>4</sub><sup>-</sup> (d), PF<sub>6</sub><sup>-</sup> (e), and CF<sub>3</sub>SO<sub>3</sub><sup>-</sup> (f).

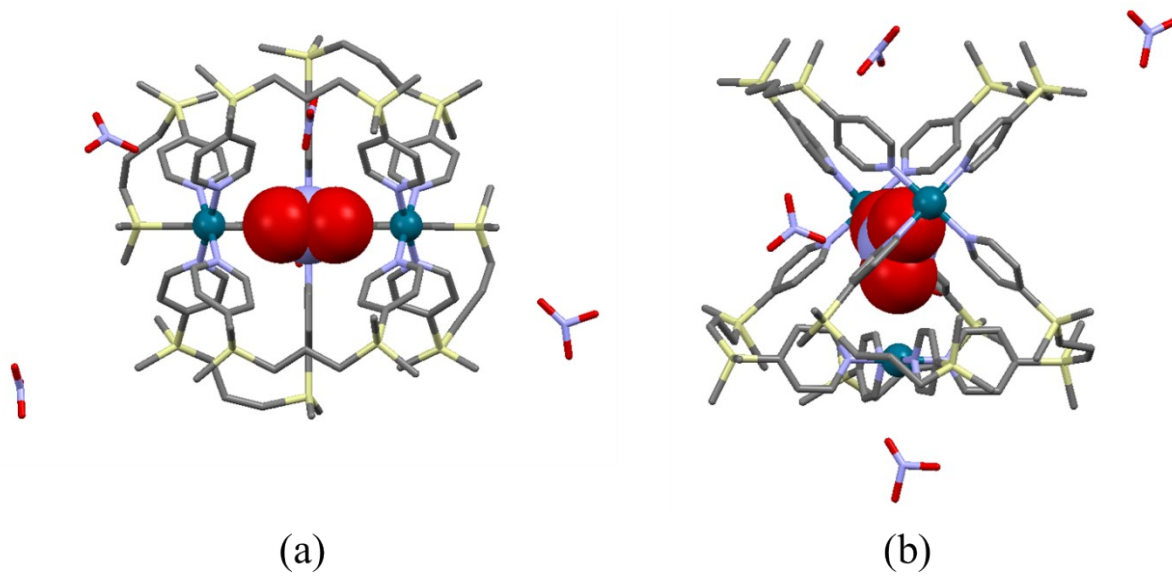

**Fig. S4** Crystal structures of  $[(\text{NO}_3)@Pd_3L_6](\text{NO}_3)_5 \cdot 2\text{Me}_2\text{SO}$  with top view (a) and side view (b).

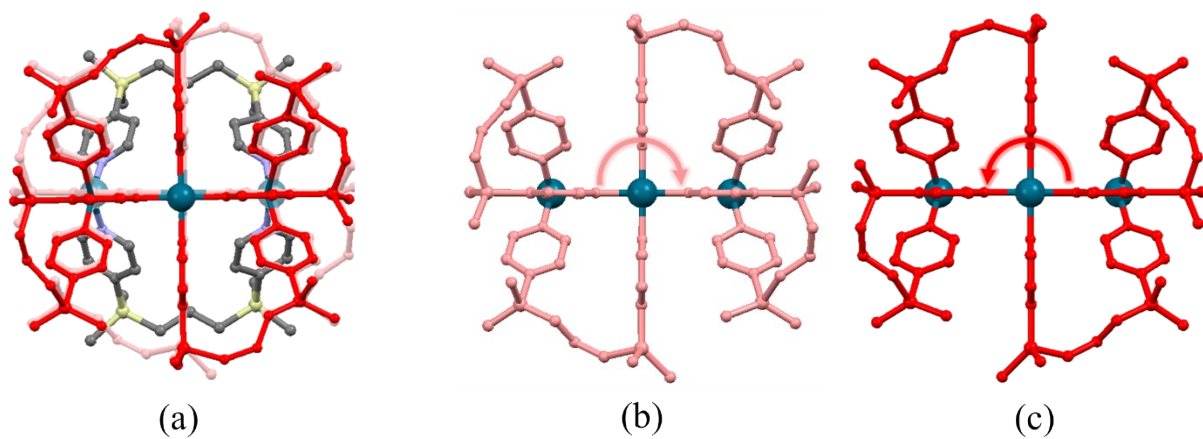

**Fig. S5** Crystal structures of  $[(\text{NO}_3)@\text{Pd}_3\text{L}_6](\text{NO}_3)_5 \cdot 2\text{Me}_2\text{SO}$  designating the disordered ligands (a): four red ligands. Its separated *P*-helical cage (b), *M*-helical cage (c).

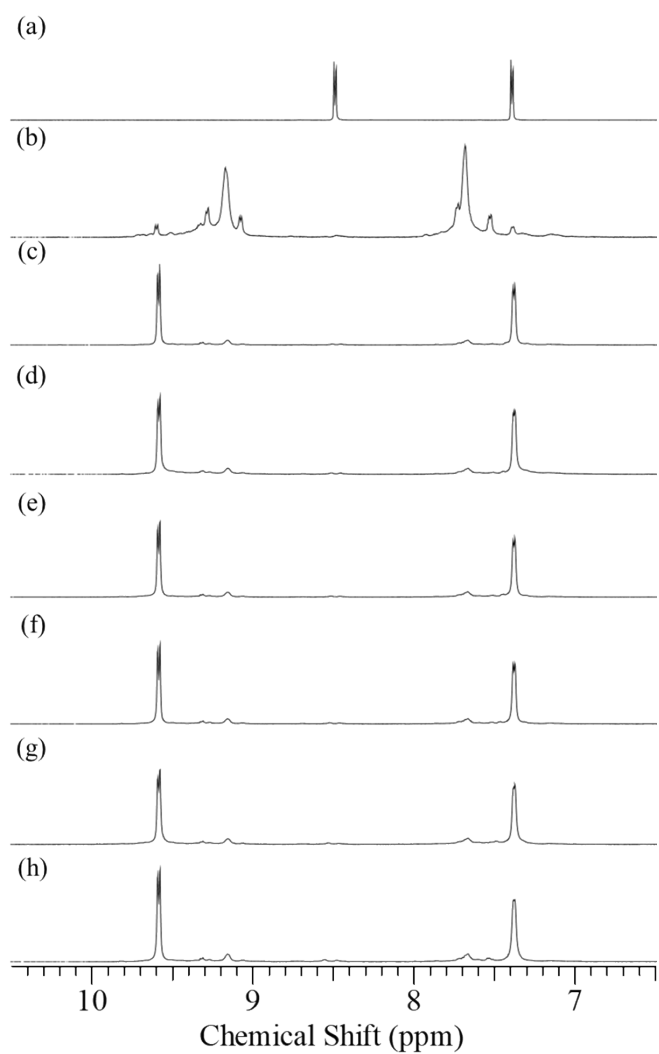

**Fig. S6** <sup>1</sup>H NMR spectra of L (a), reaction of Pd(NO<sub>3</sub>)<sub>2</sub> with L at 90 °C for 0 min (b), 10 min (c), 30 min (d), 1 h (e), 2 h (f), 4 h (g), and 12 h (h).





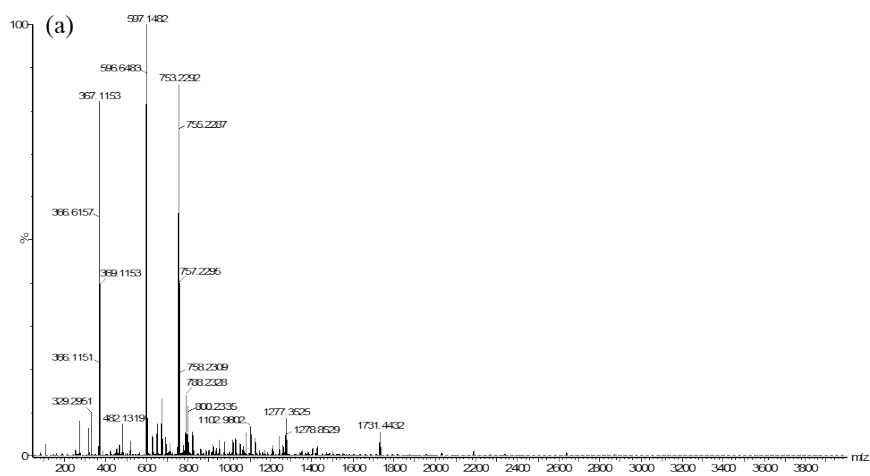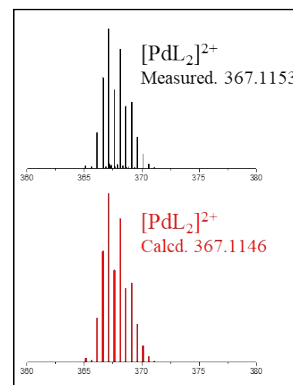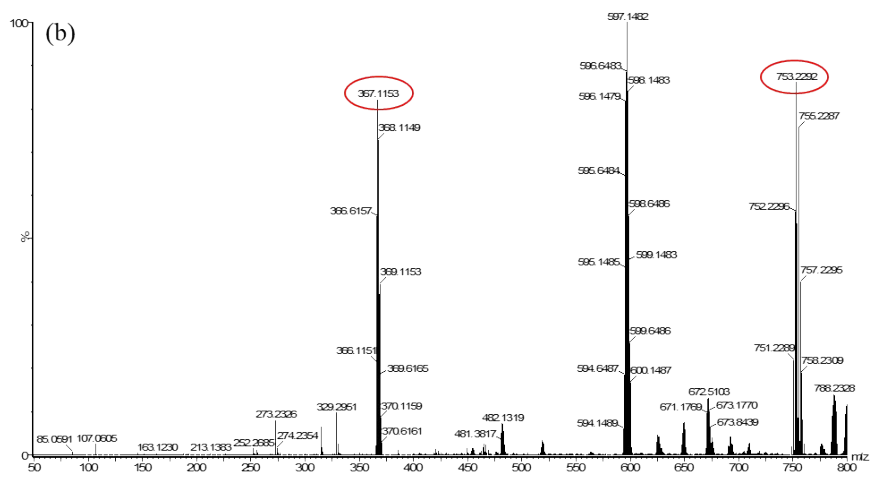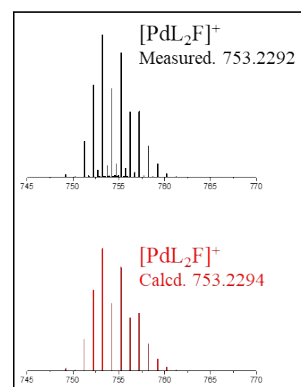

**Fig. S8** ESI-TOF-MS data of [PdL<sub>2</sub>](BF<sub>4</sub>)<sub>2</sub>.  $m/z$  range 50-4000 (a), and  $m/z$  range 50-800 (b).  $m/z$  for [PdL<sub>2</sub>]<sup>2+</sup> = 367.1153, [PdL<sub>2</sub>F]<sup>+</sup> = 753.2292

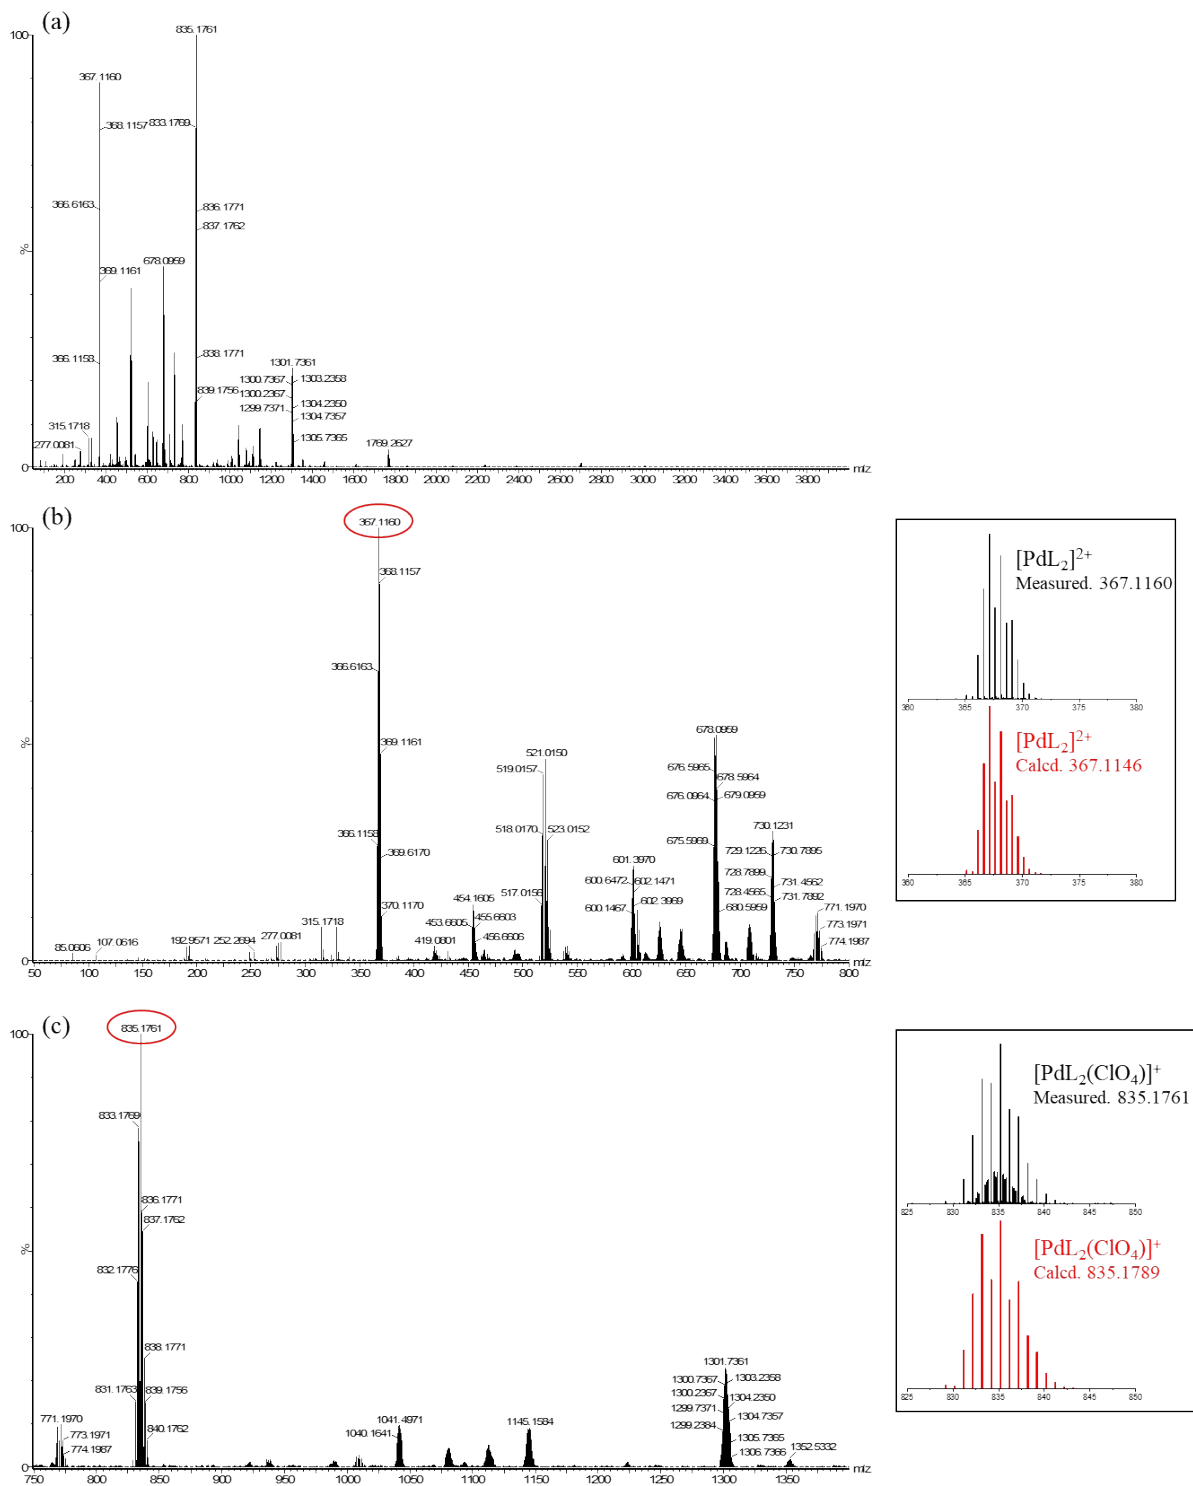

**Fig. S9** ESI-TOF-MS data of  $[\text{PdL}_2](\text{ClO}_4)_2$ .  $m/z$  range 50-4000 (a),  $m/z$  range 50-800 (b), and  $m/z$  range 750-1400 (c).  $m/z$  for  $[\text{PdL}_2]^{2+} = 367.1160$ ,  $[\text{PdL}_2(\text{ClO}_4)]^+ = 835.1761$

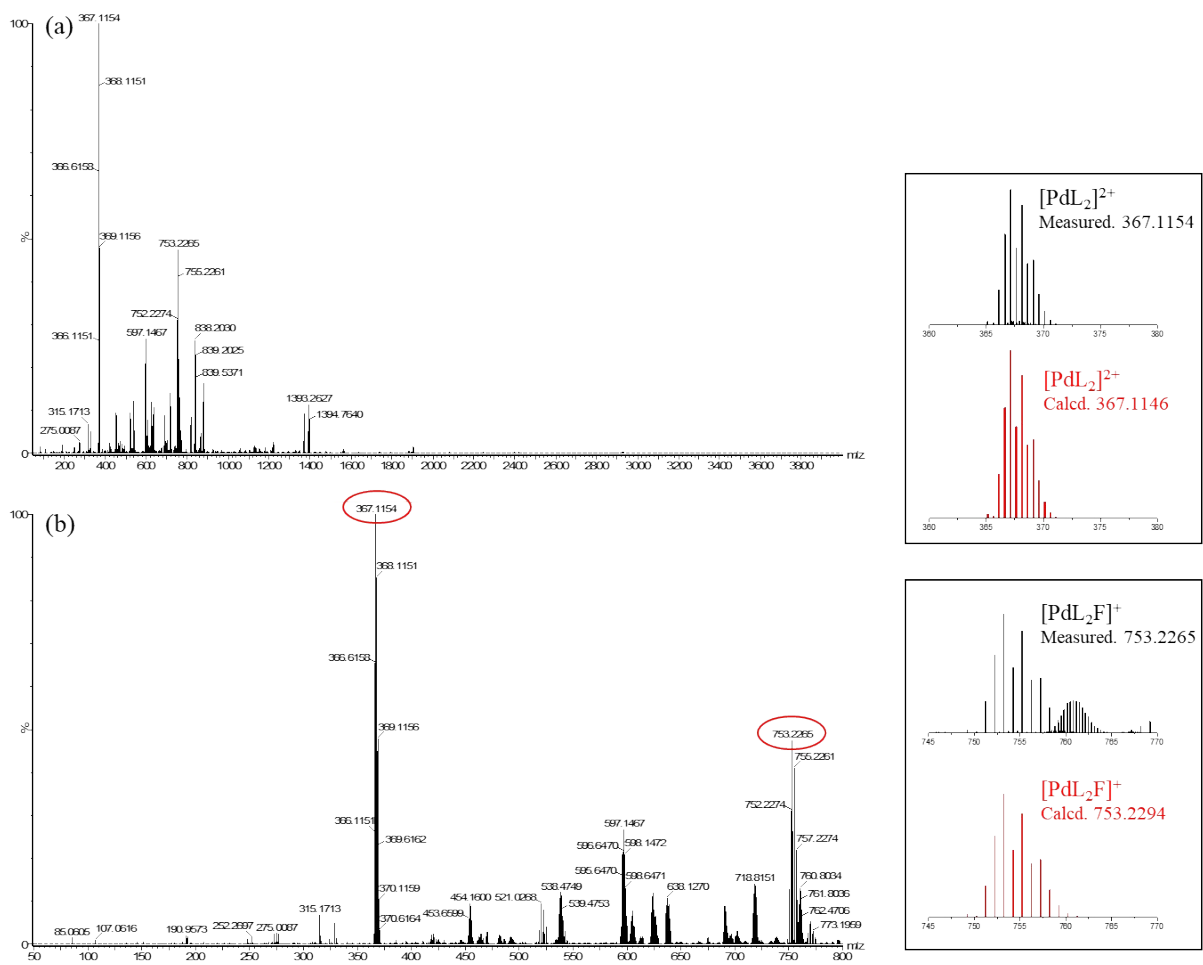

**Fig. S10** ESI-TOF-MS data of  $[\text{PdL}_2](\text{PF}_6)_2$ .  $m/z$  range 50-4000 (a), and  $m/z$  range 50-800 (b).  $m/z$  for  $[\text{PdL}_2]^{2+} = 367.1154$ ,  $[\text{PdL}_2\text{F}]^+ = 753.2265$



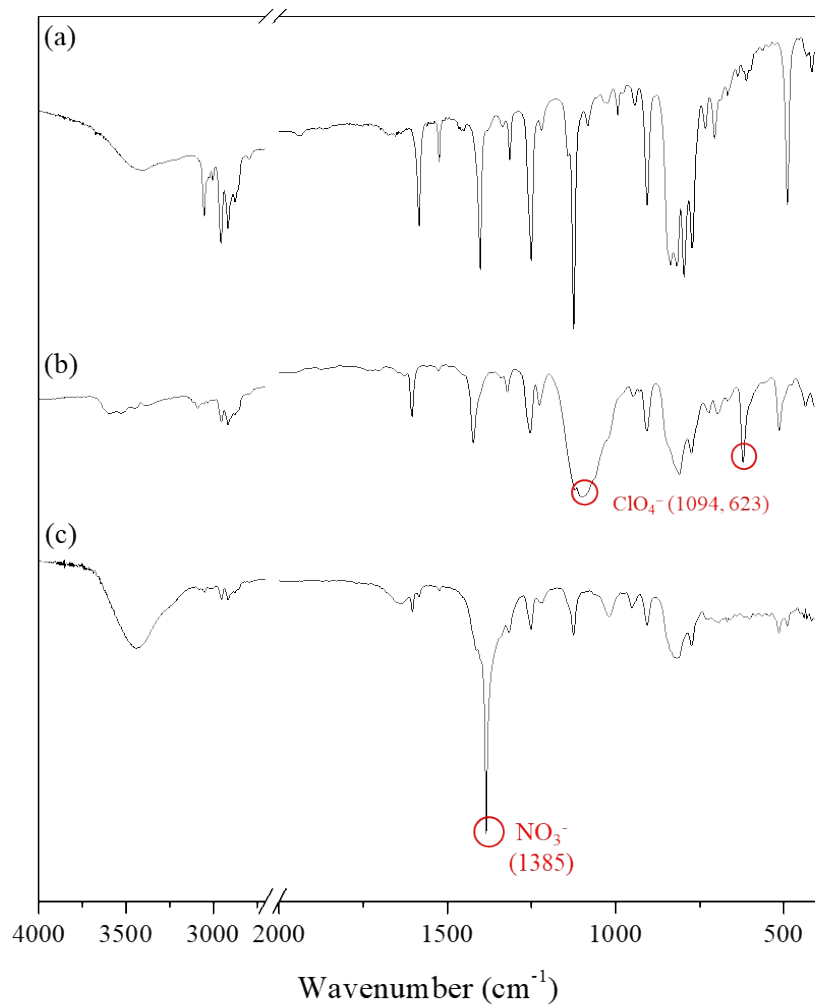

**Fig. S12** IR spectra of L (a), [PdL<sub>2</sub>](ClO<sub>4</sub>)<sub>2</sub> (b), and [(NO<sub>3</sub>)@Pd<sub>3</sub>L<sub>6</sub>](NO<sub>3</sub>)<sub>5</sub> via anion exchange of [PdL<sub>2</sub>](ClO<sub>4</sub>)<sub>2</sub> with NO<sub>3</sub><sup>-</sup> (c).
